# Supplementary material for: Wide area spray of bacterial larvicide, Bacillus thuringiensis israelensis strain AM65-52, integrated in the national vector control program impacts dengue transmission in an urban township in Sibu district, Sarawak, Malaysia
Source: PLOS journal article supplement (doi:10.1371/journal.pone.0230910), 2020-04-01
Supplement: S2 (10.1371/journal.pone.0230910.s002) [file journal.pone.0230910.s002]

**Field Simulation on the efficacy of Bti Vectobac WG****Objective:** To determine the penetration of Bti VectoBac WG in field applications.**Date:** 14/04/2015**Time:** 0800-**Sprayer:** Stihl SR 420**Spray Time:** 0903-0928 (25 minutes, with orifice 2 & 3 intermittently, On and off throughout the spray)**Product:** VectoBac WG**Mix Rate:** 125 g in 12 L water (1 caj)**Mosquito:** *Aedes aegypti* (F1050) 10 larvae in 200 ml water**Stage:** L3 (hatched 14**72-hours after Spray Operation (4th days after)\_17 April 2015**

| No. | Description (From left to Spray; corner end to main road)           | No.<br>Larvae |               |
|-----|---------------------------------------------------------------------|---------------|---------------|
|     |                                                                     |               | 3-h<br>Dead   |
| 1   | 1st house, under the staircase, beside the zinc plate               | 10            | 10            |
| 2   | 2nd house, first floor, on the ledge                                | 10            | 10            |
| 3   | 1st house, in the bushes                                            | 10            | 9             |
| 4   | 2nd house, in the bushes                                            | 10            | 10            |
| 5   | 3rd house (green), under the small table                            | 10            | 10            |
| 6   | 4th house, outside the house, near to the road                      | 10            | 10            |
| 7   | 5th house, outside the house, by the side wooden gate               | 10            | 10            |
| 8   | 6th house, inside the box at the yard compound                      | 10            | 10            |
| 9   | 6th house, nearby the window                                        | 10            | 10            |
| 10  | 6th house, in the bushes                                            | 10            | 10            |
| 11  | 7th house, on the staircase                                         | 10            | 10            |
| 12  | 7th house, 1st floor, behind the wall of balcony                    | 10            | 10            |
| 13  | 8th house (corner lot next to main road), behind the zinc plate     | 10            | 9             |
| 14  | 8th house, underneath the wood piece                                | 10            | 10            |
| 15  | 8th house, on the ground, near to the staircase                     | 10            | 10            |
| 17  | 8th house, in between the rubbish bins                              | 10            | 10            |
| 18  | 8th house, in the thick bushes (further in compare to container 16) | 10            | 9             |
| 19  | 8th house, in the thick bushes (further in compare to container 18) | 10            | 10            |
| 20  | 8th house, on the staircase to first floor.                         | 10            | 10            |
|     | <b>Mean</b>                                                         |               | <b>98.</b>    |
|     | <b>SD</b>                                                           |               | <b>3.7463</b> |
|     | <b>SE</b>                                                           |               | <b>0.8594</b> |

**72-hours after Spray Operation (4th days after)\_17 April 2015****Control**

| No. | Description (From left to Spray; corner end to main road) | No.<br>Larvae |             |
|-----|-----------------------------------------------------------|---------------|-------------|
|     |                                                           |               | 3-h<br>Dead |
| 1   | Control 1                                                 | 10            | 0           |
| 2   | Control 2                                                 | 10            | 0           |
| 3   | Control 3                                                 | 10            | 0           |
|     | <b>Mean</b>                                               |               | <b>0.</b>   |
|     | <b>SD</b>                                                 |               | <b>0.</b>   |

1000

Field Simu

Objective:

Date: 14/0

Sprayer: St

Spray Time

Product: V

Mix Rate: :

4/04/2015)

Mosquito:

Day 7 after

| Mortality |        |        | No. |
|-----------|--------|--------|-----|
| our       | 24-hr  |        |     |
| %         | Dead   | %      |     |
| 100.00    | 10     | 100.00 | 1   |
| 100.00    | 10     | 100.00 | 2   |
| 90.00     | 10     | 100.00 | 3   |
| 100.00    | 10     | 100.00 | 4   |
| 100.00    | 10     | 100.00 | 5   |
| 100.00    | 10     | 100.00 | 6   |
| 100.00    | 10     | 100.00 | 7   |
| 100.00    | 10     | 100.00 | 8   |
| 100.00    | 10     | 100.00 | 9   |
| 100.00    | 10     | 100.00 | 10  |
| 100.00    | 10     | 100.00 | 11  |
| 100.00    | 10     | 100.00 | 12  |
| 90.00     | 10     | 100.00 | 13  |
| 100.00    | 10     | 100.00 | 14  |
| 100.00    | 10     | 100.00 | 15  |
| 100.00    | 10     | 100.00 | 17  |
| 90.00     | 10     | 100.00 | 18  |
| 100.00    | 10     | 100.00 | 19  |
| 100.00    | 10     | 100.00 | 20  |
| 42        | 100.00 |        |     |
| 43246     | 0.00   |        |     |
| 70085     | 0.00   |        |     |

Day 7 after

Control

| Mortality |       |      | No. |
|-----------|-------|------|-----|
| our       | 24-hr |      |     |
| %         | Dead  | %    |     |
| 0.00      | 0     | 0.00 | 1   |
| 0.00      | 0     | 0.00 | 2   |
| 0.00      | 0     | 0.00 | 3   |
| 00        | 0.00  |      |     |
| )         | 0.00  |      |     |

# ation on the efficacy of Bti Vectobac WG

To determine the penetration of Bti VectoBac WG in field applications.

4/2015

Time: 0800-1000

ihl SR 420

æ: 0903-0928 (25 minutes, with orifice 2 & 3 intermittently, On and off throughout the spray)

ectoBac WG

125 g in 12 L water (1 caj)

*Aedes aegypti* (F1050) 10 larvae in remaining water

Stage: L3 (hatched 17/04/2015)

r Spray Operation\_20th April 2015

| Description (From left to Spray; corner end to main road)           | No.<br>Larvae | Mort   |        |
|---------------------------------------------------------------------|---------------|--------|--------|
|                                                                     |               | 5-hour |        |
|                                                                     |               | Dead   | %      |
| 1st house, under the staircase, beside the zinc plate               | 10            | 10     | 100.00 |
| 2nd house, first floor, on the ledge                                | 10            | 10     | 100.00 |
| 1st house, in the bushes                                            | 10            | 10     | 100.00 |
| 2nd house, in the bushes                                            | 10            | 10     | 100.00 |
| 3rd house (green), under the small table                            | 10            | 10     | 100.00 |
| 4th house, outside the house, near to the road                      | 10            | 10     | 100.00 |
| 5th house, outside the house, by the side wooden gate               | 10            | 10     | 100.00 |
| 6th house, inside the box at the yard compound                      | 10            | 10     | 100.00 |
| 6th house, nearby the window                                        | 10            | 10     | 100.00 |
| 6th house, in the bushes                                            | 10            | 10     | 100.00 |
| 7th house, on the staircase                                         | 10            | 10     | 100.00 |
| 7th house, 1st floor, behind the wall of balcony                    | 10            | 10     | 100.00 |
| 8th house (corner lot next to main road), behind the zinc plate     | 10            | 10     | 100.00 |
| 8th house, underneath the wood piece                                | 10            | 10     | 100.00 |
| 8th house, on the ground, near to the staircase                     | 10            | 10     | 100.00 |
| 8th house, in between the rubbish bins                              | 10            | 10     | 100.00 |
| 8th house, in the thick bushes (further in compare to container 16) | 10            | 10     | 100.00 |
| 8th house, in the thick bushes (further in compare to container 18) | 10            | 10     | 100.00 |
| 8th house, on the staircase to first floor.                         | 10            | 10     | 100.00 |
| Mean                                                                |               | 100.00 |        |
| SD                                                                  |               | 0      |        |
| SE                                                                  |               | 0      |        |

r Spray Operation\_20th April 2015

| Description (From left to Spray; corner end to main road) | No.<br>Larvae | Mort   |      |
|-----------------------------------------------------------|---------------|--------|------|
|                                                           |               | 5-hour |      |
|                                                           |               | Dead   | %    |
| Control 1                                                 | 10            | 0      | 0.00 |
| Control 2                                                 | 10            | 0      | 0.00 |
| Control 3                                                 | 10            | 0      | 0.00 |
| Mean                                                      |               | 0.00   |      |
| SD                                                        |               | 0      |      |

**Field Simulation on the efficacy of Bti Vectobac WG****Objective:** To determine the penetration of Bti VectoBac WG in field applications.**Date:** 14/04/2015**Sprayer:** Stihl SR 420**Spray Time:** 0903-0928 (25 minutes, with orifice 2 & 3 intermittently, On and off the**Product:** VectoBac WG**Mix Rate:** 125 g in 12 L water (1 caj)**Mosquito:** *Aedes aegypti* (F1050) 10 larvae in remaining water**Day 14 after Spray Operation\_27th April 2015**

Day 1 After spray operation\_27th April 2019

| Mortality |        | No. | Description (From left to Spray; corner end to main road)           |
|-----------|--------|-----|---------------------------------------------------------------------|
| 24-hr     |        |     |                                                                     |
| Dead      | %      |     |                                                                     |
| 10        | 100.00 | 1   | 1st house, under the staircase, beside the zinc plate               |
| 10        | 100.00 | 2   | 2nd house, first floor, on the ledge                                |
| 10        | 100.00 | 3   | 1st house, in the bushes                                            |
| 10        | 100.00 | 4   | 2nd house, in the bushes                                            |
| 10        | 100.00 | 5   | 3rd house (green), under the small table                            |
| 10        | 100.00 | 6   | 4th house, outside the house, near to the road                      |
| 10        | 100.00 | 7   | 5th house, outside the house, by the side wooden gate               |
| 10        | 100.00 | 8   | 6th house, inside the box at the yard compound                      |
| 10        | 100.00 | 9   | 6th house, nearby the window                                        |
| 10        | 100.00 | 10  | 6th house, in the bushes                                            |
| 10        | 100.00 | 11  | 7th house, on the staircase                                         |
| 10        | 100.00 | 12  | 7th house, 1st floor, behind the wall of balcony                    |
| 10        | 100.00 | 13  | 8th house (corner lot next to main road), behind the zinc plate     |
| 10        | 100.00 | 14  | 8th house, underneath the wood piece                                |
| 10        | 100.00 | 15  | 8th house, on the ground, near to the staircase                     |
| 10        | 100.00 | 17  | 8th house, in between the rubbish bins                              |
| 10        | 100.00 | 18  | 8th house, in the thick bushes (further in compare to container 16) |
| 10        | 100.00 | 19  | 8th house, in the thick bushes (further in compare to container 18) |
| 10        | 100.00 | 20  | 8th house, on the staircase to first floor.                         |
| 100.00    |        |     | Mean                                                                |
| 0.00      |        |     | SD                                                                  |
| 0.00      |        |     | SE                                                                  |

**Day 14 after Spray Operation\_27th April 2015****Control**

| Mortality |      | No. | Description (From left to Spray; corner end to main road) |
|-----------|------|-----|-----------------------------------------------------------|
| 24-hr     |      |     |                                                           |
| Dead      | %    |     |                                                           |
| 0         | 0.00 | 1   | Control 1                                                 |
| 0         | 0.00 | 2   | Control 2                                                 |
| 0         | 0.00 | 3   | Control 3                                                 |
| 0.00      |      |     | Mean                                                      |
| 0         |      |     | SD                                                        |

Time: 0800-1000

roughout the spray)

Stage: L3 (hatched 24/04/2015)

Field Site

Objective

Date: 14

Sprayer:

Spray Time

Product:

Mix Ratio

Mosquito

Day 21 after

| No.<br>Larvae | Mortality   |        |        |        | No. |
|---------------|-------------|--------|--------|--------|-----|
|               | 5-hour      |        | 24-hr  |        |     |
|               | Dead        | %      | Dead   | %      |     |
| 10            | 10          | 100.00 | 10     | 100.00 | 1   |
| 10            | 10          | 100.00 | 10     | 100.00 | 2   |
| 10            | 10          | 100.00 | 10     | 100.00 | 3   |
| 10            | 7           | 70.00  | 10     | 100.00 | 4   |
| 10            | 10          | 100.00 | 10     | 100.00 | 5   |
| 10            | 10          | 100.00 | 10     | 100.00 | 6   |
| 10            | 10          | 100.00 | 10     | 100.00 | 7   |
| 10            | 10          | 100.00 | 10     | 100.00 | 8   |
| 10            | 9           | 90.00  | 10     | 100.00 | 9   |
| 10            | 10          | 100.00 | 10     | 100.00 | 10  |
| 10            | 9           | 90.00  | 10     | 100.00 | 11  |
| 10            | 10          | 100.00 | 10     | 100.00 | 12  |
| 10            | 10          | 100.00 | 10     | 100.00 | 13  |
| 10            | 10          | 100.00 | 10     | 100.00 | 14  |
| 10            | 10          | 100.00 | 10     | 100.00 | 15  |
| 10            | 10          | 100.00 | 10     | 100.00 | 17  |
| 10            | 10          | 100.00 | 10     | 100.00 | 18  |
| 10            | 10          | 100.00 | 10     | 100.00 | 19  |
| 10            | 10          | 100.00 | 10     | 100.00 | 20  |
|               | 97.37       |        | 100.00 |        |     |
|               | 7.334928056 |        | 0.00   |        |     |
|               | 1.682747903 |        | 0.00   |        |     |

Day 21 after

Control

| No.<br>Larvae | Mortality |      |       |       | No. |
|---------------|-----------|------|-------|-------|-----|
|               | 5-hour    |      | 24-hr |       |     |
|               | Dead      | %    | Dead  | %     |     |
| 10            | 0         | 0.00 | 0     | 0.00  | 1   |
| 10            | 0         | 0.00 | 1     | 10.00 | 2   |
| 10            | 0         | 0.00 | 0     | 0.00  | 3   |
|               | 0.00      |      | 3.33  |       |     |
|               | 0         |      | 5.77  |       |     |

# **Penetration of Bti Vectobac WG**

**Objective:** To determine the penetration of Bti VectoBac WG in field applications.

**Date:** 04/05/2015

**Time:** 0800-1000

**Equipment:** Stihl SR 420

**Duration:** 0903-0928 (25 minutes, with orifice 2 & 3 intermittently, On and off throughout the spray)

**Material:** VectoBac WG

**Concentration:** 125 g in 12 L water (1 caj)

**Species:** *Aedes aegypti* (F1050) 10 larvae in remaining water

**Stage:** L3 (hatched 01/05/2015)

**Location:** After Spray Operation\_04 May 2015

| Description (From left to Spray; corner end to main road)           | No. Larvae | Mortality          |        |
|---------------------------------------------------------------------|------------|--------------------|--------|
|                                                                     |            | 3-hour             |        |
|                                                                     |            | Dead               | %      |
| 1st house, under the staircase, beside the zinc plate               | 10         | 10                 | 100.00 |
| 2nd house, first floor, on the ledge                                | 10         | 10                 | 100.00 |
| 1st house, in the bushes                                            | 10         | 10                 | 100.00 |
| 2nd house, in the bushes                                            | 10         | 7                  | 70.00  |
| 3rd house (green), under the small table                            | 10         | 10                 | 100.00 |
| 4th house, outside the house, near to the road                      | 10         | 10                 | 100.00 |
| 5th house, outside the house, by the side wooden gate               | 10         | 10                 | 100.00 |
| 6th house, inside the box at the yard compound                      | 10         | 10                 | 100.00 |
| 6th house, nearby the window                                        | 10         | 9                  | 90.00  |
| 6th house, in the bushes                                            | 10         | 10                 | 100.00 |
| 7th house, on the staircase                                         | 10         | 9                  | 90.00  |
| 7th house, 1st floor, behind the wall of balcony                    | 10         | 10                 | 100.00 |
| 8th house (corner lot next to main road), behind the zinc plate     | 10         | 10                 | 100.00 |
| 8th house, underneath the wood piece                                | 10         | 10                 | 100.00 |
| 8th house, on the ground, near to the staircase                     | 10         | 10                 | 100.00 |
| 8th house, in between the rubbish bins                              | 10         | 10                 | 100.00 |
| 8th house, in the thick bushes (further in compare to container 16) | 10         | 10                 | 100.00 |
| 8th house, in the thick bushes (further in compare to container 18) | 10         | 10                 | 100.00 |
| 8th house, on the staircase to first floor.                         | 10         | 10                 | 100.00 |
| <b>Mean</b>                                                         |            | <b>97.37</b>       |        |
| <b>SD</b>                                                           |            | <b>7.334928056</b> |        |
| <b>SE</b>                                                           |            | <b>1.682747903</b> |        |

**Location:** After Spray Operation\_04 May 2015

| Description (From left to Spray; corner end to main road) | No. Larvae | Mortality   |      |
|-----------------------------------------------------------|------------|-------------|------|
|                                                           |            | 3-hour      |      |
|                                                           |            | Dead        | %    |
| Control 1                                                 | 10         | 0           | 0.00 |
| Control 2                                                 | 10         | 0           | 0.00 |
| Control 3                                                 | 10         | 0           | 0.00 |
| <b>Mean</b>                                               |            | <b>0.00</b> |      |
| <b>SD</b>                                                 |            | <b>0</b>    |      |

### Field Simulation on the efficacy of Bti Vectobac WG

**Objective:** To determine the penetration of Bti VectoBac WG in field applications.

**Date:** 14/04/2015

**Sprayer:** Stihl SR 420

**Spray Time:** 0903-0928 (25 minutes, with orifice 2 & 3 intermittently, On and off the

**Product:** VectoBac WG

**Mix Rate:** 125 g in 12 L water (1 caj)

**Mosquito:** *Aedes aegypti* (F1052) 10 larvae/cup in remaining water + refill another

**Day 28 after Spray Operation\_11 May 2015**

5)

Day 20 after Spray Operation\_11 May 2018

| Mortality |        | No. | Description (From left to Spray; corner end to main road)           |
|-----------|--------|-----|---------------------------------------------------------------------|
| 24-hr     |        |     |                                                                     |
| Dead      | %      |     |                                                                     |
| 10        | 100.00 | 1   | 1st house, under the staircase, beside the zinc plate               |
| 10        | 100.00 | 2   | 2nd house, first floor, on the ledge                                |
| 10        | 100.00 | 3   | 1st house, in the bushes                                            |
| 10        | 100.00 | 4   | 2nd house, in the bushes                                            |
| 10        | 100.00 | 5   | 3rd house (green), under the small table                            |
| 10        | 100.00 | 6   | 4th house, outside the house, near to the road                      |
| 10        | 100.00 | 7   | 5th house, outside the house, by the side wooden gate               |
| 10        | 100.00 | 8   | 6th house, inside the box at the yard compound                      |
| 10        | 100.00 | 9   | 6th house, nearby the window                                        |
| 10        | 100.00 | 10  | 6th house, in the bushes                                            |
| 10        | 100.00 | 11  | 7th house, on the staircase                                         |
| 10        | 100.00 | 12  | 7th house, 1st floor, behind the wall of balcony                    |
| 10        | 100.00 | 13  | 8th house (corner lot next to main road), behind the zinc plate     |
| 10        | 100.00 | 14  | 8th house, underneath the wood piece                                |
| 10        | 100.00 | 15  | 8th house, on the ground, near to the staircase                     |
| 10        | 100.00 | 17  | 8th house, in between the rubbish bins                              |
| 10        | 100.00 | 18  | 8th house, in the thick bushes (further in compare to container 16) |
| 10        | 100.00 | 19  | 8th house, in the thick bushes (further in compare to container 18) |
| 10        | 100.00 | 20  | 8th house, on the staircase to first floor.                         |
| 100.00    |        |     | Mean                                                                |
| 0.00      |        |     | SD                                                                  |
| 0.00      |        |     | SE                                                                  |

**Day 21 after Spray Operation\_04 May 2015**

**Control**

| Mortality |      | No. | Description (From left to Spray; corner end to main road) |
|-----------|------|-----|-----------------------------------------------------------|
| 24-hr     |      |     |                                                           |
| Dead      | %    |     |                                                           |
| 0         | 0.00 | 1   | Control 1                                                 |
| 0         | 0.00 | 2   | Control 2                                                 |
| 0         | 0.00 | 3   | Control 3                                                 |
| 0.00      |      |     | Mean                                                      |
| 0.00      |      |     | SD                                                        |

Time: 0800-1000

roughout the spray)

200 ml water

Stage: L3 (hatched 08/05/2015, 5pm)

| No.<br>Larvae | Mortality |        |       |        |       |        |       |        |      |
|---------------|-----------|--------|-------|--------|-------|--------|-------|--------|------|
|               | 3-hour    |        | 24-hr |        | 48-Hr |        | 72-Hr |        | 96-  |
|               | Dead      | %      | Dead  | %      | Dead  | %      | Dead  | %      | Dead |
| 10            | 9         | 90.00  | 10    | 100.00 | 10    | 100.00 | 10    | 100.00 | 10   |
| 10            | 1         | 10.00  | 9     | 90.00  | 10    | 100.00 | 10    | 100.00 | 10   |
| 10            | 1         | 10.00  | 9     | 90.00  | 9     | 90.00  | 10    | 100.00 | 10   |
| 10            | 6         | 60.00  | 10    | 100.00 | 10    | 100.00 | 10    | 100.00 | 10   |
| 10            | 1         | 10.00  | 8     | 80.00  | 10    | 100.00 | 10    | 100.00 | 10   |
| 10            | 3         | 30.00  | 10    | 100.00 | 10    | 100.00 | 10    | 100.00 | 10   |
| 10            | 1         | 10.00  | 10    | 100.00 | 10    | 100.00 | 10    | 100.00 | 10   |
| 10            | 3         | 30.00  | 10    | 100.00 | 10    | 100.00 | 10    | 100.00 | 10   |
| 10            | 10        | 100.00 | 10    | 100.00 | 10    | 100.00 | 10    | 100.00 | 10   |
| 10            | 2         | 20.00  | 10    | 100.00 | 10    | 100.00 | 10    | 100.00 | 10   |
| 10            | 10        | 100.00 | 10    | 100.00 | 10    | 100.00 | 10    | 100.00 | 10   |
| 10            | 3         | 30.00  | 10    | 100.00 | 10    | 100.00 | 10    | 100.00 | 10   |
| 10            | 9         | 90.00  | 10    | 100.00 | 10    | 100.00 | 10    | 100.00 | 10   |
| 10            | 0         | 0.00   | 10    | 100.00 | 10    | 100.00 | 10    | 100.00 | 10   |
| 10            | 2         | 20.00  | 10    | 100.00 | 10    | 100.00 | 10    | 100.00 | 10   |
| 10            | 0         | 0.00   | 9     | 90.00  | 10    | 100.00 | 10    | 100.00 | 10   |
| 10            | 1         | 10.00  | 10    | 100.00 | 10    | 100.00 | 10    | 100.00 | 10   |
| 10            | 0         | 0.00   | 8     | 80.00  | 8     | 80.00  | 9     | 90.00  | 10   |
| 10            | 10        | 100.00 | 10    | 100.00 | 10    | 100.00 | 10    | 100.00 | 10   |
|               | 37.89     |        | 96.32 |        | 98.42 |        | 99.47 |        | 100  |
|               | 38.38     |        | 6.84  |        | 5.01  |        | 2.29  |        | 0.0  |
|               | 8.81      |        | 1.57  |        | 1.15  |        | 0.53  |        | 0.0  |

Day 28 after Spray Operation\_11 May 2015

Control

| No.<br>Larvae | Mortality |      |       |      | No. | Descriptio | No.<br>Larvae |        |      |
|---------------|-----------|------|-------|------|-----|------------|---------------|--------|------|
|               | 3-hour    |      | 24-hr |      |     |            |               | 3-hour |      |
|               | Dead      | %    | Dead  | %    |     |            |               | Dead   | %    |
| 10            | 0         | 0.00 | 0     | 0.00 | 1   | Control 1  | 10            | 0      | 0.00 |
| 10            | 0         | 0.00 | 0     | 0.00 | 2   | Control 2  | 10            | 0      | 0.00 |
| 10            | 0         | 0.00 | 0     | 0.00 | 3   | Control 3  | 10            | 0      | 0.00 |
|               | 0.00      |      | 0.00  |      |     | Mean       |               | 0.00   |      |
|               | 0         |      | 0.00  |      |     | SD         |               | 0      |      |
